# Supplementary material
Source: PubMed Central journal article supplement (PMC404033)

Supplemental Figure 1

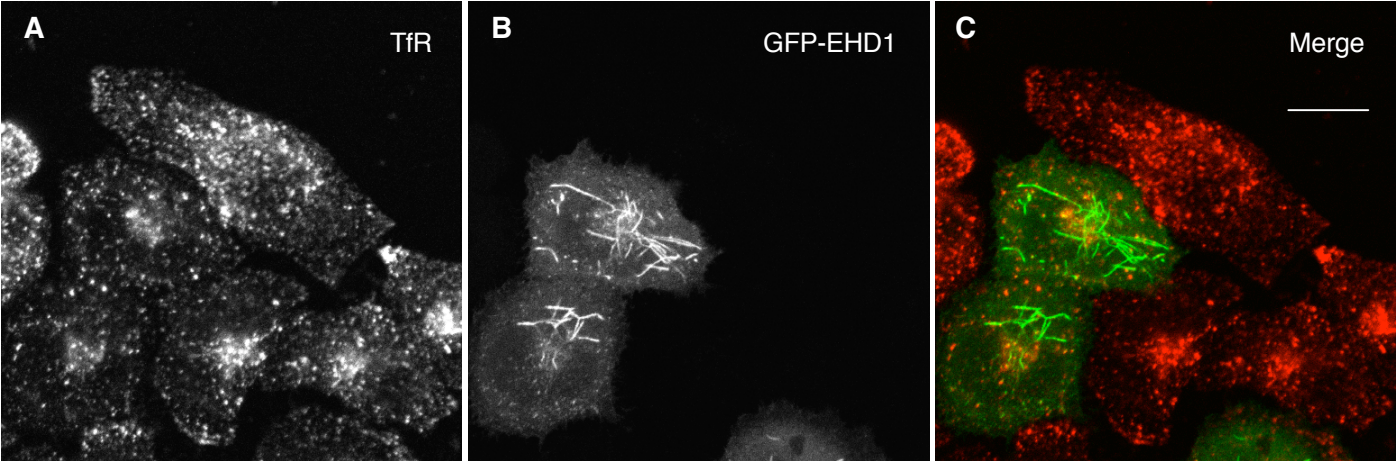

Supplement: mbc_15_5_2410__1.pdf [file mbc_15_5_2410__1.pdf]
